# Supplementary material
Source: PubMed Central journal article supplement (PMC8014195)
Supplement: jamacardiol-e210475-s002.pdf [file jamacardiol-e210475-s002.pdf]

## Supplemental Online Content

Mayer K, Hein-Rothweiler R, Schüpke S, et al. Efficacy and safety of revacept, a novel lesion-directed competitive antagonist to platelet glycoprotein vi, in patients undergoing elective percutaneous coronary intervention for stable ischemic heart disease: the randomized, double-blind, placebo-controlled ISAR-PLASTER phase 2 trial. *JAMA Cardiol*. Published online March 31, 2021.  
doi:10.1001/jamacardio.2021.0475

**eAppendix 1.** Committees and Investigators

**eAppendix 2.** Coordinating ISAR Research Center

**eAppendix 3.** Statistics

**eTable 1.** Angiographic and Interventional Characteristics

**eTable 2.** Concomitant Medication

**eTable 3.** Efficacy Endpoints at 30 Days

**eTable 4.** Laboratory Parameters at 48h

**eTable 5.** ECG Parameters at 48h

**eTable 6.** Baseline Patient Characteristics in Centers With vs. Without Planned Platelet Function Evaluation (Adenosine Diphosphate-Induced Platelet Aggregation)

**eTable 7.** Angiographic and Interventional Characteristics in Centers With vs. Without Planned Platelet Function Evaluation (Adenosine Diphosphate-Induced Platelet Aggregation)

**eTable 8.** Evaluation of ADP and Collagen-Induced Platelet Aggregation at 48h

**eFigure 1.** Kaplan–Meier Survival Curves of Major Adverse Cardiovascular Events (Left Panel) and BARC Type 2 to 5 Bleeding (Right Panel) at 30 Days.

**eMethods.**

This supplemental material has been provided by the authors to give readers additional information about their work.

# 1. Committees and Investigators

## **Steering Committee**

Adnan Kastrati (Chair)  
Klinik für Herz- und Kreislauferkrankungen  
Deutsches Herzzentrum München  
Technical University of Munich  
Lazarettstr. 36, 80636 Munich, Germany

Steffen Massberg  
Medizinische Klinik und Poliklinik I  
Klinikum der Universität München  
Marchioninstr. 15, 81377 Munich, Germany

Karl-Ludwig Laugwitz  
1. Medizinische Klinik und Poliklinik  
Klinikum rechts der Isar,  
Technical University of Munich  
Ismaninger Str. 22, 81675 Munich, Germany

Stefanie Schüpke  
Klinik für Herz- und Kreislauferkrankungen  
Deutsches Herzzentrum München  
Technical University of Munich  
Lazarettstr. 36, 80636 Munich, Germany

Dirk Sibbing  
Privatklinik Lauterbacher Mühle am Ostersee, Iffeldorf and  
Medizinische Klinik und Poliklinik I  
Klinikum der Universität München  
Marchioninstr. 15, 81377 Munich, Germany

Andreas Zeiher  
Universitätsklinikum Frankfurt am Main  
Medizinische Klinik III, Kardiologie/Angiologie  
Theodor-Stern-Kai 7, 60590 Frankfurt/Main, Germany

## **Data Safety Monitoring Board**

Marco Valgimigli (Chair)  
Inselspital, Universitätsspital Bern  
Universitätsklinik für Kardiologie  
Schweizer Herz- und Gefäßzentrum Bern  
Freiburgstr. 18  
3010 Bern, Switzerland

Peter Jüni  
Applied Health Research Centre (AHRC)  
Li Ka Shing Knowledge Institute of St. Michael's Hospital

30 Bond St, Toronto, M5B 1W8, Canada

Michael Maeng  
Aarhus University Hospital, Department of Cardiology  
Palle Juul-Jensens Boulevard 99, 8200 Aarhus N, Denmark

### **Event Adjudication Committee**

Julia Ellert (Chair)  
Odense University Hospital  
Department of Cardiology  
J. B. Winsløws Vej 4  
5000 Odense C, Denmark

Fadil Ademaj  
Klinikum Nürnberg Süd, Klinik für Innere Medizin 8  
Breslauer Str. 201  
90471 Nürnberg, Germany

Georg Marcus Fröhlich  
HerzClinic Luzern AG  
St. Anna-Str. 32  
6006 Luzern, Switzerland

### **Participating Centers and Investigators**

#### **Klinik für Herz- und Kreislauferkrankungen, Deutsches Herzzentrum München**

Adnan Kastrati (PI), Katharina Mayer (Deputy PI), Jens Wiebe (Deputy PI, FEB/2020)

Investigators: Sebastian Kufner, Tanja Morath, Erion Xhepa

Study Nurses: Tatjana Bruch, Anna Dietrich, Bettina Harrer, Monika Neumeyer

#### **Medizinische Klinik und Poliklinik I (Campus Großhadern and Campus Innenstadt), Klinik der Universität München**

Ralph Hein-Rothweiler (PI, JAN/2019), Dirk Sibbing (PI, NOV/2017-JAN/2019), Lisa Gross  
(Deputy PI - NOV/2017-APR/2019), Danny Kupka (Deputy PI)

Investigators: Stefanie Bieber, Johannes Brado, Simon Deseive, Sarah Gschwendtner, Stefan  
Kääb, Kathrin Krieg, Anja Loew, Martin Orban, Tobias Petzold, Konstantin Stark, Julius  
Steffen, Anna Katharina Strüven, Raffael Thaler

Study Nurses: Gabriele Baur, Monika Baylacher, Julia Dominguez-Escobar, Karin  
Hohenleitner-Lührßen, Janina Neubarth-Mayer, Kseniia Schmidt, Janine Vogt

#### **1. Medizinische Klinik, Klinikum rechts der Isar, München,**

Karl-Ludwig Laugwitz (PI), Rainer Okrojek (Deputy PI)

Investigators: Isabell Bernlochner, Christian Bradaric, Ralf Dirschinger, Michael Domasch, Tareg Ibrahim, Christian Kupatt, Mark Lachmann, Jakob Ledwoch, Daniel Sinnecker, Tristan Tschaikowsky

Study Nurses: Christine Berke, Heike Fengler, Sabrina Doering, Dagmar Reitberger, Victoria Zillmann

**Medizinische Klinik III - Kardiologie und Angiologie, Eberhard Karls University of Tübingen**

Oliver Borst (PI), Tobias Geisler (Deputy PI), Dominik Rath (Deputy PI)

Investigators: Michael Droppa

Study Nurses: Miriam Ayed-Walz, Stefanie Herholz, Martina Heusel, Timea Keller, Diana Lombardi

**Department of Cardiology, University Medical Center Mainz**

Tommaso Gori (PI), Thomas Münzel (Deputy PI)

Investigators: Zisis Dimitriadis, Sebastian Hollmann, Dudu Kutlu, Anadol Renzi, Bettina Ruff

Study Nurses: Julia Gadinger, Gabriele Gebel, Saskia Goetze, Melanie Hochmuth, Sarah Rohleder, Keslin Schulz, Ilka Walther, Susanne Wüst

**Medizinische Klinik für Kardiologie, Charité - Universitätsmedizin Berlin Campus Benjamin Franklin**

David Manuel Leistner (PI), Arash Haghikia (Deputy PI)

Investigators: Anne-Sophie Schatz, Denitsa Meteva

Study Nurses: Sevilay Güler, Katja Hubert, Julia Leibiger, Derya Oezcelik, Jasmin Radenkovic, Ines Redlich

**Charité - Universitätsmedizin Berlin Campus Virchow**

Tobias Trippel (PI), Frank Edelmann (Deputy PI)

Investigators: Felix Bähr, Maximilian Krisper, Johannes Petutschnigg, Cristina Rozados da Conceicao, Leonard Schlußner, Veronika Zach

Study Nurses: Jens Brestrich, Svenja Broschag, Haley Hartmann, Bianca Papke, Angel Phuti, Jasmin Radenkovic, Sophia Stempel

### **Medizinische Klinik III, Universitätsklinikum Frankfurt am Main**

Mariuca Vasa-Nicotera (PI), Andreas Zeiher (Deputy PI)

Investigators: Birgit Aßmus, Eleni Giokoglu, Stephan Fichtlscherer, Philipp Seppelt, Matthias Trumm, Helge Weiler

Study Nurses: Mine Bilge, Margret Müller-Ardogan, Bahar Sabanci, Menza Tekeste, Andrea Wolf, Evelin Wunderlich

## **2. Coordinating ISAResearch Center**

### **Deutsches Herzzentrum München, Munich:**

Adnan Kastrati (Chairman), Stefanie Schüpke (Medical Supervisor)

### **Project Management:**

Marion Janisch, Barbara v. Merzljak, Sonja Siepe

### **Study Coordination/Study Assistant:**

Julia Müller, Anke Wasmund

### **Data Management:**

Eva Grünzinger, Oliver Krueger, Anja Münnich

### **SAE Management:**

Marion Janisch, Silvia Müller, Traian Popescu, Franziska Prömm, Stefanie Schüpke

### **Monitoring**

Andrea Mecklenburg, Silvia Müller, Benedikt Schwartz

## **3. Statistics**

Alexander Hapfelmeier

Institute of Medical Informatics, Statistics and Epidemiology and Institute of General Practice and Health Services Research, School of Medicine, Technical University of Munich, Germany

Ismaninger Str. 22, 81675 Munich, Germany

Kurt Ulm  
Klinikum rechts der Isar  
Technical University of Munich, Institute of Medical Informatics, Statistics and  
Epidemiology  
Ismaninger Str. 22, 81675 Munich, Germany

## 4. eTables and eFigure

**eTable 1.** Angiographic and Interventional Characteristics

| <b>Characteristic</b>                                    | <b>Revacept 160 mg<br/>(n = 193)</b> | <b>Revacept 80 mg<br/>(n = 164)</b> | <b>Placebo<br/>(n = 160)</b> |
|----------------------------------------------------------|--------------------------------------|-------------------------------------|------------------------------|
| Target vessel, No. (%)                                   |                                      |                                     |                              |
| Left main coronary artery                                | 12 (6.2)                             | 11 (6.7)                            | 8 (5.0)                      |
| Left anterior descending coronary artery                 | 90 (46.6)                            | 54 (32.9)                           | 67 (41.9)                    |
| Left circumflex coronary artery                          | 43 (22.3)                            | 40 (24.4)                           | 48 (30.0)                    |
| Right coronary artery                                    | 48 (24.9)                            | 56 (34.1)                           | 37 (23.1)                    |
| Bypass graft                                             | 0 (0.0)                              | 3 (1.8)                             | 0 (0.0)                      |
| Complex lesion (type B2/C), No. (%)                      | 132 (68.4)                           | 105 (64.0)                          | 105 (65.6)                   |
| Chronic total occlusion, No. (%)                         | 11 (5.7)                             | 9 (5.5)                             | 9 (5.6)                      |
| TIMI flow grade before the intervention, No. (%)         |                                      |                                     |                              |
| 0                                                        | 6 (3.1)                              | 4 (2.4)                             | 7 (4.4)                      |
| 1                                                        | 2 (1.0)                              | 6 (3.7)                             | 3 (1.9)                      |
| 2                                                        | 11 (5.7)                             | 4 (2.4)                             | 5 (3.1)                      |
| 3                                                        | 174 (90.2)                           | 150 (91.5)                          | 144 (90.0)                   |
| Type of intervention, No. (%)                            |                                      |                                     |                              |
| Drug eluting stent                                       | 184 (95.3)                           | 152 (92.7)                          | 143 (89.4)                   |
| Drug eluting balloon                                     | 5 (2.6)                              | 7 (4.3)                             | 11 (6.9)                     |
| PTCA only                                                | 6 (3.1)                              | 12 (7.3)                            | 14 (8.8)                     |
| Total stented length, median (IQR), mm <sup>a</sup>      | 23.0 (18.0, 33.8)                    | 23.0 (18.0, 33.0)                   | 23.0 (18.0, 29.0)            |
| Maximum stent diameter, median (IQR), mm <sup>a</sup>    | 3.0 (3.0, 3.5)                       | 3.5 (3.0, 3.5)                      | 3.0 (2.8, 3.5)               |
| Maximum balloon diameter, median (IQR), mm <sup>b</sup>  | 3.5 (3.0, 3.5)                       | 3.5 (3.0, 3.5)                      | 3.0 (2.5, 3.5)               |
| Maximum balloon pressure, median (IQR), atm <sup>c</sup> | 15.0 (12.5, 18.0)                    | 14.0 (12.0, 17.5)                   | 14.0 (12.0, 16.0)            |

| TIMI flow grade after the intervention,<br>No. (%) |            |            |            |
|----------------------------------------------------|------------|------------|------------|
| 0                                                  | 2 (1.0)    | 2 (1.2)    | 0 (0.0)    |
| 1                                                  | 0 (0.0)    | 1 (0.6)    | 3 (1.9)    |
| 2                                                  | 0 (0.0)    | 0 (0.0)    | 0 (0.0)    |
| 3                                                  | 191 (99.0) | 161 (98.2) | 156 (97.5) |

There were no significant between-group differences in procedural characteristics. PCI, percutaneous coronary intervention; PTCA, percutaneous transluminal coronary angioplasty; TIMI, Thrombolysis in Myocardial Infarction.

<sup>a</sup> Total stent length and maximal stent diameter refer only to lesions treated with stent(s).

<sup>b</sup> Maximum balloon diameter not available in 6 patients (2 in the Revacept 160 mg group, 3 in the Revacept 80 mg group and 1 in the Placebo group).

<sup>c</sup> Maximum balloon pressure not available in 8 patients (2 in the Revacept 160 mg group, 5 in the Revacept 80 mg group and 1 in the Placebo group).



**eTable 2.** Concomitant Medication

| Characteristic                                          | Revacept 160 mg<br>(n = 120) | Revacept 80 mg<br>(n = 121) | Placebo<br>(n = 93) |
|---------------------------------------------------------|------------------------------|-----------------------------|---------------------|
| Drug therapy at Baseline, No. (%)                       |                              |                             |                     |
| Aspirin                                                 | 111 (92.5)                   | 110 (90.9)                  | 83 (89.2)           |
| Clopidogrel                                             | 63 (52.5)                    | 58 (47.9)                   | 58 (62.4)           |
| Statin                                                  | 107 (89.2)                   | 107 (88.4)                  | 86 (92.5)           |
| Betablocker                                             | 63 (52.2)                    | 65 (53.7)                   | 50 (53.8)           |
| ACE inhibitor/ARB                                       | 88 (73.3)                    | 95 (78.5)                   | 72 (77.4)           |
| Periprocedural antithrombotic medication                |                              |                             |                     |
| No study drug, No. (%) <sup>a</sup>                     | 0 (0.0)                      | 2 (1.7)                     | 0 (0.0)             |
| Aspirin loading, No. (%) <sup>b</sup>                   | 85 (70.8)                    | 85 (70.2)                   | 69 (74.2)           |
| Aspirin loading dose, median (IQR), mg <sup>c</sup>     | 500 (500, 500)               | 500 (500, 500)              | 500 (500, 500)      |
| Clopidogrel loading, No. (%) <sup>b</sup>               | 99 (82.5)                    | 101 (83.5)                  | 74 (79.6)           |
| Clopidogrel loading dose, median (IQR), mg <sup>c</sup> | 600 (600, 600)               | 600 (600, 600)              | 600 (600, 600)      |
| Unfractionated heparin, No. (%)                         | 120 (100)                    | 121 (100)                   | 93 (100)            |
| Unfractionated heparin total dose, median (IQR), IU     | 7000 (5000,8000)             | 7000 (6000,8500)            | 7000 (6000,8000)    |
| Drug Therapy at Discharge, No. (%)                      |                              |                             |                     |
| Aspirin                                                 | 119 (99.2)                   | 120 (99.2)                  | 93 (100)            |
| Clopidogrel <sup>d</sup>                                | 120 (100)                    | 120 (99.2)                  | 93 (100)            |
| Statin                                                  | 117 (97.5)                   | 116 (95.9)                  | 91 (97.8)           |
| Betablocker                                             | 77 (64.2)                    | 73 (60.3)                   | 54 (58.1)           |
| ACE inhibitor/ARB                                       | 94 (78.3)                    | 102 (84.3)                  | 80 (86.0)           |

There were no significant between-group differences in concomitant medication.

ACE, angiotensin-converting enzyme inhibitor; ARB, angiotensin II receptor blocker heparin.

<sup>a</sup> Study medication was not administered in 2 patients in the Revacept 80 mg group (due to concerns with the quality of study drug preparation in 1 patient; due to changed treatment strategy to aorto-coronary bypass surgery in 1 patient).

<sup>b</sup> Aspirin loading was administered immediately prior to and clopidogrel loading on an average of 3.7 hours prior to percutaneous coronary intervention. Patients who did not receive clopidogrel loading were on chronic antiplatelet therapy on admission.

<sup>c</sup> Aspirin and clopidogrel loading doses are shown only for those patients who obtained the respective loading.

<sup>d</sup> Prasugrel was administered at discharge in 1 patient in the Revacept 80 mg group.

**eTable 3.** Efficacy Endpoints at 30 Days

| Characteristic                                               | Revacept 160 mg<br>(n = 120) | Revacept 80 mg<br>(n = 121) | Placebo<br>(n = 93) | P value |
|--------------------------------------------------------------|------------------------------|-----------------------------|---------------------|---------|
| All-cause mortality, No. (%)                                 | 0                            | 1 (0.8)                     | 0                   |         |
| Myocardial infarction, No. (%)                               | 3 (2.5)                      | 3 (2.5)                     | 2 (2.2)             |         |
| Type 3                                                       | 0                            | 1                           | 0                   |         |
| Type 4a                                                      | 3                            | 1                           | 2                   |         |
| Type 5                                                       | 0                            | 1                           | 0                   |         |
| Definite stent thrombosis, No.                               | 0                            | 0                           | 0                   |         |
| Urgent coronary revascularization,<br>No. (%)                | 0                            | 2 (1.7)                     | 0                   |         |
| Stroke, No.                                                  | 0                            | 0                           | 0                   |         |
| Major adverse cardiovascular<br>events, No. (%) <sup>a</sup> | 3 (2.5)                      | 4 (3.3)                     | 2 (2.2)             | 0.91    |

<sup>a</sup> Major adverse cardiovascular events include death, myocardial infarction, stroke or urgent coronary revascularization.

**eTable 4.** Laboratory Parameters at 48h

| <b>Characteristic</b>                                                 | <b>Revacept 160 mg<br/>(n = 120)</b> | <b>Revacept 80 mg<br/>(n = 119)</b> | <b>Placebo<br/>(n = 93)</b> | <b>P<br/>value</b> |
|-----------------------------------------------------------------------|--------------------------------------|-------------------------------------|-----------------------------|--------------------|
| <b>Biochemistry</b>                                                   |                                      |                                     |                             |                    |
| ALAT/SGPT, median (IQR), U/L <sup>a</sup>                             | 21.8 (16.1, 32.5)                    | 22.0 (16.1, 29.5)                   | 21.9 (18.2, 27.5)           | 0.90               |
| Alkaline phosphatase, median (IQR), U/L <sup>b</sup>                  | 70.6 (62.0, 85.8)                    | 66.9 (53.5, 80.5)                   | 67.0 (58.0, 78.0)           | 0.07               |
| ASAT/SGOT, median (IQR), U/L <sup>c</sup>                             | 24.2 (19.6, 31.4)                    | 23.1 (19.0, 27.5)                   | 23.5 (19.0, 27.6)           | 0.40               |
| Blood urea, median (IQR), mg/dL <sup>d</sup>                          | 32.1 (26.3, 40.7)                    | 31.6 (24.9, 38.6)                   | 31.5 (27.9, 35.5)           | 0.47               |
| Creatine kinase, median (IQR), U/L <sup>e</sup>                       | 97.0 (66.5, 141.0)                   | 89.0 (63.2, 115.8)                  | 91.0 (62.5, 133.5)          | 0.44               |
| Creatine kinase-myocardial band, median (IQR), U/L <sup>f</sup>       | 13.8 (11.1, 16.1)                    | 13.8 (10.7, 17.1)                   | 13.6 (11.2, 16.5)           | 0.99               |
| Gamma-GT, median (IQR), U/L <sup>g</sup>                              | 26.0 (19.9, 46.8)                    | 31.5(21.7, 49.4)                    | 26.8 (19.0, 39.0)           | 0.16               |
| Creatinine, median (IQR), mg/dL <sup>h</sup>                          | 1.0 (0.9, 1.1)                       | 1.0 (0.9, 1.1)                      | 0.9 (0.8, 1.1)              | 0.07               |
| Lactate dehydrogenase, median (IQR), U/L <sup>i</sup>                 | 173.0 (150.0, 205.0)                 | 174.0 (150.0, 198.2)                | 165.0 (149.0, 187.0)        | 0.46               |
| Glucose, median (IQR), mg/dL <sup>j</sup>                             | 114.0 (99.0, 148.0)                  | 117.0 (103.0, 145.0)                | 109.0 (99.0, 137.5)         | 0.17               |
| Sodium, median (IQR), mmol/L <sup>k</sup>                             | 140 (139.0, 141.0)                   | 140 (138.5, 141.0)                  | 140.0 (139.0, 141.0)        | 0.24               |
| Potassium, median (IQR), mmol/L <sup>l</sup>                          | 4.2 (3.9, 4.4)                       | 4.1 (4.0, 4.3)                      | 4.1 (3.9, 4.4)              | 0.75               |
| Total bilirubin, median (IQR), mg/dL <sup>m</sup>                     | 0.6 (0.5, 0.9)                       | 0.6 (0.4, 0.9)                      | 0.6 (0.5, 0.8)              | 0.99               |
| Uric acid, median (IQR), mg/dL <sup>n</sup>                           | 5.5 (4.6, 6.6)                       | 5.4 (4.8, 6.5)                      | 5.5 (4.9, 6.4)              | 0.99               |
| C-reactive protein, median (IQR), mg/dL <sup>o</sup>                  | 3.0 (1.4, 7.3)                       | 3.6 (1.8, 6.7)                      | 4.4 (1.7, 8.0)              | 0.38               |
| <b>Hematology</b>                                                     |                                      |                                     |                             |                    |
| Hemoglobin, median (IQR), g/dL <sup>p</sup>                           | 13.7 (12.6, 14.8)                    | 14.0 (12.8, 15.4)                   | 13.9 (13.3, 14.8)           | 0.51               |
| Platelet count, median (IQR), 10 <sup>9</sup> /L <sup>q</sup>         | 220.0 (181.5, 244.5)                 | 212.0 (181.0, 245.0)                | 214.0 (180.8, 245.0)        | 0.97               |
| Red blood cell count, median (IQR), 10 <sup>12</sup> /L <sup>r</sup>  | 4.5 (4.2, 4.9)                       | 4.6 (4.1, 5.0)                      | 4.6 (4.4, 4.9)              | 0.60               |
| White blood cell count, median (IQR), 10 <sup>9</sup> /L <sup>s</sup> | 6.9 (5.8, 8.6)                       | 7.0 (5.7, 8.9)                      | 7.1 (6.0, 8.0)              | 0.99               |

|                                                                       |                      |                      |                     |       |
|-----------------------------------------------------------------------|----------------------|----------------------|---------------------|-------|
| Differential Blood Count, median (IQR), %                             |                      |                      |                     |       |
| Neutrophils <sup>t</sup>                                              | 63.0 (59.0, 68.0)    | 61.0 (57.0, 66.0)    | 63.0 (58.0, 66.0)   | 0.27  |
| Lymphocytes <sup>u</sup>                                              | 25.0 (20.0, 31.0)    | 24.9 (21.0, 31.0)    | 25.0 (21.0, 30.0)   | 0.97  |
| Eosinophils <sup>v</sup>                                              | 2.1 (1.9, 3.6)       | 3.0 (2.0, 4.0)       | 2.1 (2.0, 4.0)      | 0.25  |
| Basophils <sup>w</sup>                                                | 1.0 (0.7, 1.0)       | 1.0 (0.5, 1.0)       | 1.0 (0.2, 1.0)      | 0.436 |
| Monocytes <sup>x</sup>                                                | 8.0 (7.0, 10.0)      | 9.0 (8.0, 11.0)      | 9.0 (7.0, 11.0)     | 0.04  |
| <b>Coagulation</b>                                                    |                      |                      |                     |       |
| Activated partial thromboplastin time, median (IQR), sec <sup>y</sup> | 27.0 (25.0, 29.1)    | 27.4 (25.0, 30.0)    | 27.6 (25.0, 29.8)   | 0.73  |
| Quick, median (IQR), % <sup>z</sup>                                   | 109.0 (100.2, 116.8) | 107.0 (100.0, 115.0) | 108.0 (97.2, 114.0) | 0.37  |
| International normalized ratio, median (IQR) <sup>aa</sup>            | 1.0 (0.9, 1.0)       | 1.0 (0.9, 1.0)       | 1.0 (0.9, 1.0)      | 0.19  |

Data are shown for the modified intention-to-treat population.

ALAT/SGPT, alanine aminotransferase/ serum glutamate-pyruvate transaminase; ASAT/SGOT, aspartate aminotransferase/ serum glutamic-oxaloacetic transaminase; gamma-GT, gamma-glutamyl transferase.

<sup>a</sup> ALAT/SGPT not available in 4 patients (1 in the Revacept 160 mg group and 3 in the Placebo group).

<sup>b</sup> Alkaline phosphatase not available in 7 patients (2 in the Revacept 160 mg group, 1 in the Revacept 80 mg group and 4 in the Placebo group).

<sup>c</sup> ASAT/SGOT not available in 3 patients (1 in the Revacept 160 mg group and 2 in the Placebo group).

<sup>d</sup> Blood urea not available in 2 patients (1 in the Revacept 160 mg group and 1 in the Placebo group).

<sup>e</sup> Creatine kinase not available in 4 patients (1 in the Revacept 160 mg group, 1 in the Revacept 80 mg group and 2 in the Placebo group).

<sup>f</sup> Creatine kinase-myocardial band not available in 123 patients (41 in the Revacept 160 mg group, 47 in the Revacept 80 mg group and 35 in the Placebo group).

<sup>g</sup> Gamma-GT not available in 3 patients (1 in the Revacept 160 mg group and 2 in the Placebo group).

<sup>h</sup> Creatinine not available in 2 patients (1 in the Revacept 160 mg group and 1 in the Placebo group).

<sup>i</sup> Lactate dehydrogenase not available in 10 patients (3 in the Revacept 160 mg group, 3 in the Revacept 80 mg group and 4 in the Placebo group).

<sup>j</sup> Glucose not available in 6 patients (2 in the Revacept 160 mg group, 2 in the Revacept 80 mg group and 2 in the Placebo group).

<sup>k</sup> Sodium not available in 2 patients (1 in the Revacept 160 mg group and 1 in the Placebo group).

<sup>l</sup> Potassium not available in 2 patients (1 in the Revacept 160 mg group and 1 in the Placebo group).

- <sup>m</sup> Total bilirubin not available in 5 patients (1 in the Revacept 160 mg group, 1 in the Revacept 80 mg group and 3 in the Placebo group).
- <sup>n</sup> Uric acid not available in 5 patients (2 in the Revacept 160 mg group, 1 in the Revacept 80 mg group and 2 in the Placebo group).
- <sup>o</sup> C-reactive protein not available in 3 patients (1 in the Revacept 160 mg group, 1 in the Revacept 80 mg group and 1 in the Placebo group).
- <sup>p</sup> Hemoglobin not available in 2 patients (1 in the Revacept 160 mg group and 1 in the Placebo group).
- <sup>q</sup> Platelet count not available in 2 patients (1 in the Revacept 160 mg group and 1 in the Placebo group).
- <sup>r</sup> Red blood cell count not available in 2 patients (1 in the Revacept 160 mg group and 1 in the Placebo group).
- <sup>s</sup> White blood cell count not available in 2 patients (1 in the Revacept 160 mg group and 1 in the Placebo group).
- <sup>t</sup> Neutrophils not available in 19 patients (8 in the Revacept 160 mg group, 7 in the Revacept 80 mg group and 4 in the Placebo group).
- <sup>u</sup> Lymphocytes not available in 10 patients (3 in the Revacept 160 mg group, 3 in the Revacept 80 mg group and 4 in the Placebo group).
- <sup>v</sup> Eosinophils not available in 13 patients (6 in the Revacept 160 mg group, 3 in the Revacept 80 mg group and 4 in the Placebo group).
- <sup>w</sup> Basophils not available in 16 patients (6 in the Revacept 160 mg group, 6 in the Revacept 80 mg group and 4 in the Placebo group).
- <sup>x</sup> Monocytes not available in 10 patients (3 in the Revacept 160 mg group, 3 in the Revacept 80 mg group and 4 in the Placebo group).
- <sup>y</sup> Activated partial thromboplastin time not available in 8 patients (2 in the Revacept 160 mg group, 3 in the Revacept 80 mg group and 3 in the Placebo group).
- <sup>z</sup> Quick not available in 8 patients (2 in the Revacept 160 mg group, 3 in the Revacept 80 mg group and 3 in the Placebo group).
- <sup>aa</sup> International normalized ratio not available in 8 patients (2 in the Revacept 160 mg group, 3 in the Revacept 80 mg group and 3 in the Placebo group).

**eTable 5.** ECG Parameters at 48h

| <b>Characteristic</b>                               | <b>Revacept 160 mg<br/>(n = 120)</b> | <b>Revacept 80 mg<br/>(n = 119)</b> | <b>Placebo<br/>(n = 93)</b> | <b>P value</b> |
|-----------------------------------------------------|--------------------------------------|-------------------------------------|-----------------------------|----------------|
| Pacemaker ECG, No. (%) <sup>a</sup>                 | 7 (5.9)                              | 4 (3.4)                             | 1 (1.1)                     | 0.19           |
| Rhythm, No. (%) <sup>b</sup>                        |                                      |                                     |                             | 0.34           |
| Sinus rhythm                                        | 117 (98.3)                           | 119 (100.0)                         | 92 (100.0)                  |                |
| Atrial fibrillation                                 | 0 (0.0)                              | 1 (0.8)                             | 0 (0.0)                     |                |
| Other                                               | 2 (1.7)                              | 0 (0.0)                             | 0 (0.0)                     |                |
| Heart rate, median (IQR),<br>beats/min <sup>c</sup> | 65.0 (60.0, 71.5)                    | 65.0 (58.2, 75.0)                   | 63.5 (60.0, 71.0)           | 0.32           |
| PQ interval, median (IQR),<br>ms <sup>d</sup>       | 176.0 (160.0, 194.0)                 | 170.0 (156.0, 190.0)                | 173.0 (154.5, 190.0)        | 0.17           |
| QTc interval, median (IQR),<br>ms <sup>e</sup>      | 423.0 (404.0, 447.0)                 | 421.0 (400.0, 436.0)                | 414 (398.5, 435.0)          | 0.03           |
| Left bundle branch block,<br>No. (%) <sup>f</sup>   | 1 (0.9)                              | 2 (1.7)                             | 2 (2.2)                     | 0.86           |

Data are shown for the modified intention-to-treat population.

ECG, electrocardiogram; QTc Interval, corrected QT Interval.

<sup>a</sup> Pacemaker ECG not available in 5 patients (1 in the Revacept 160 mg group, 1 in the Revacept 80 mg group and 3 in the Placebo group).

<sup>b</sup> Rhythm not available 5 patients (1 in the Revacept 160 mg group, 1 in the Revacept 80 mg group and 3 in the Placebo group).

<sup>c</sup> Heart rate not available in 2 patients (1 in the Revacept 160 mg group and 1 in the Placebo group).

<sup>d</sup> PQ Interval not available in 8 patients (3 in the Revacept 160 mg group, 2 in the Revacept 80 mg group and 3 in the Placebo group).

<sup>e</sup> QTc Interval not available in 8 patients (3 in the Revacept 160 mg group, 2 in the Revacept 80 mg group and 3 in the Placebo group).

<sup>f</sup> Left bundle branch block information not available in 8 patients (3 in the Revacept 160 mg group, 2 in the Revacept 80 mg group and 3 in the Placebo group).

**eTable 6.** Baseline Patient Characteristics in Centers With vs. Without Planned Platelet Function Evaluation (Adenosine Diphosphate-Induced Platelet Aggregation)

| Characteristic                                          | Centers with planned PFE<br>(n = 205) | Centers without planned PFE<br>(n = 129) | P value |
|---------------------------------------------------------|---------------------------------------|------------------------------------------|---------|
| Age, median (IQR), y                                    | 68.6 (61.3, 75.0)                     | 65.9 (60.8, 75.4)                        | 0.33    |
| Female sex, No. (%)                                     | 42 (20.5)                             | 39 (30.2)                                | 0.06    |
| Weight, median (IQR), kg                                | 82.0 (73.0, 91.0)                     | 82.0 (71.0, 94.0)                        | 0.84    |
| Race, No. (%)                                           |                                       |                                          | 0.25    |
| Caucasian                                               | 204 (99.5)                            | 126 (97.7)                               |         |
| Black                                                   | 0 (0.0)                               | 1 (0.8)                                  |         |
| Asian                                                   | 1 (0.5)                               | 2 (1.6)                                  |         |
| Cardiovascular risk factors, No. (%)                    |                                       |                                          |         |
| Diabetes mellitus                                       | 50 (24.4)                             | 39 (30.2)                                | 0.29    |
| Insulin therapy                                         | 16 (32.0)                             | 15 (38.5)                                | 0.52    |
| Current smoker                                          | 41 (20.0)                             | 26 (20.2)                                | 0.96    |
| Arterial hypertension                                   | 175 (85.4)                            | 121 (93.8)                               | 0.03    |
| Hypercholesterolemia                                    | 188 (91.7)                            | 110 (85.3)                               | 0.10    |
| Medical history, No. (%)                                |                                       |                                          |         |
| Myocardial infarction                                   | 41 (20.0)                             | 33 (25.6)                                | 0.29    |
| PCI                                                     | 111 (54.1)                            | 77 (59.7)                                | 0.38    |
| CABG                                                    | 14 (6.8)                              | 13 (10.1)                                | 0.39    |
| Stroke                                                  | 3 (1.5)                               | 5 (3.9)                                  | 0.27    |
| Peripheral arterial occlusive disease                   | 17 (8.3)                              | 9 (7.0)                                  | 0.82    |
| COPD                                                    | 9 (4.4)                               | 8 (6.2)                                  | 0.63    |
| Renal insufficiency                                     | 16 (7.8)                              | 15 (11.6)                                | 0.33    |
| Family history of premature CAD, No. (%)                | 76 (37.1)                             | 65 (51.6)                                | 0.01    |
| High sensitivity cardiac troponin T, median (IQR), ng/L | 9.00 (7.00, 11.00)                    | 13.0 (13.00, 13.00)                      | <0.001  |
| Creatinine, median (IQR), mg/dL                         | 1.00 (0.86, 1.11)                     | 0.90 (0.80, 1.10)                        | 0.02    |
| Body temperature, median (IQR), °C                      | 36.5 (36.4, 36.8)                     | 36.6 (36.4, 36.8)                        | 0.02    |
| Heart rate, median (IQR), beats/min                     | 64.0 (57.0, 70.0)                     | 67.0 (60.0, 74.0)                        | 0.05    |
| Blood pressure, median (IQR), mm Hg                     |                                       |                                          |         |

|                                           |                      |                      |        |
|-------------------------------------------|----------------------|----------------------|--------|
| Systolic                                  | 144.0 (130.0, 156.0) | 138.0 (124.0, 148.0) | <0.001 |
| Diastolic                                 | 80.0 (73.0, 88.0)    | 78.0 (70.0, 85.0)    | 0.02   |
| Access site, No. (%)                      |                      |                      | 0.07   |
| femoral                                   | 110 (53.7)           | 54 (41.9)            |        |
| radial                                    | 94 (45.9)            | 74 (57.4)            |        |
| brachial                                  | 1 (0.5)              | 1 (0.8)              |        |
| No. of diseased coronary vessels, No. (%) |                      |                      | 0.09   |
| One vessel                                | 40 (19.5)            | 17 (13.2)            |        |
| Two vessels                               | 69 (33.7)            | 36 (27.9)            |        |
| Three vessels                             | 96 (46.8)            | 76 (58.9)            |        |
| Closure device, No. (%)                   | 68 (33.2)            | 45 (34.9)            | 0.84   |

CABG, coronary-artery bypass grafting; CAD, coronary artery disease; COPD, chronic obstructive pulmonary disease; PCI, percutaneous coronary intervention; PFE, platelet function evaluation.



**eTable 7.** Angiographic and Interventional Characteristics in Centers With vs. Without Planned Platelet Function Evaluation (Adenosine Diphosphate-Induced Platelet Aggregation)

| <b>Characteristic</b>                            | <b>Centers with<br/>planned PFE<br/>(n = 327)</b> | <b>Centers without<br/>planned PFE<br/>(n = 190)</b> | <b>P value</b> |
|--------------------------------------------------|---------------------------------------------------|------------------------------------------------------|----------------|
| Target vessel, No. (%)                           |                                                   |                                                      |                |
| Left main coronary artery                        | 18 (5.5)                                          | 13 (6.8)                                             |                |
| Left anterior descending coronary artery         | 144 (44.0)                                        | 67 (35.3)                                            |                |
| Left circumflex coronary artery                  | 87 (26.6)                                         | 44 (23.2)                                            |                |
| Right coronary artery                            | 75 (22.9)                                         | 66 (34.7)                                            |                |
| Bypass graft                                     | 3 (0.9)                                           | 0 (0.0)                                              |                |
| Complex lesion (type B2/C), No. (%)              | 229 (70.0)                                        | 113 (59.5)                                           | 0.68           |
| Chronic total occlusion, No. (%)                 | 6 (1.8)                                           | 23 (12.1)                                            | >0.99          |
| TIMI flow grade before the intervention, No. (%) |                                                   |                                                      | 0.38           |
| 0                                                | 3 (0.9)                                           | 14 (7.4)                                             |                |
| 1                                                | 3 (0.9)                                           | 8 (4.2)                                              |                |
| 2                                                | 13 (4.0)                                          | 7 (3.7)                                              |                |
| 3                                                | 307 (93.9)                                        | 161 (84.7)                                           |                |
| Type of intervention, No. (%)                    |                                                   |                                                      |                |
| Drug eluting stent                               | 301 (92.0)                                        | 178 (93.7)                                           | 0.10           |
| Drug eluting balloon                             | 14 (4.3)                                          | 9 (4.7)                                              | 0.15           |
| PTCA only                                        | 24 (7.3)                                          | 8 (4.2)                                              | 0.07           |
| Total stented length, median (IQR), mm           | 23.0 (18.0, 33.0)                                 | 24.0 (18.0, 37.8)                                    | 0.181          |
| Maximum stent diameter, median (IQR), mm         | 3.0 (3.0, 3.5)                                    | 3.0 (2.8, 3.5)                                       | 0.898          |
| Maximum balloon diameter, median (IQR), mm       | 3.5 (3.0, 3.5)                                    | 3.0 (2.5, 3.5)                                       | 0.19           |
| Maximum balloon pressure, median (IQR), atm      | 15.0 (12.0, 18.0)                                 | 14.0 (12.0, 16.0)                                    | 0.04           |

|                                                 |            |            |      |
|-------------------------------------------------|------------|------------|------|
| TIMI flow grade after the intervention, No. (%) |            |            | 0.16 |
| 0                                               | 1 (0.3)    | 3 (1.6)    |      |
| 1                                               | 2 (0.6)    | 2 (1.1)    |      |
| 2                                               | 0 (0.0)    | 0 (0.0)    |      |
| 3                                               | 323 (98.8) | 185 (97.4) |      |

PCI, percutaneous coronary intervention; PFE, platelet function evaluation; PTCA, percutaneous transluminal coronary angioplasty; TIMI, Thrombolysis in Myocardial Infarction.

**eTable 8.** Evaluation of ADP and Collagen-Induced Platelet Aggregation at 48h

| Characteristic                                                                              | Revacept 160 mg     | Revacept 80 mg       | Placebo              | P value |
|---------------------------------------------------------------------------------------------|---------------------|----------------------|----------------------|---------|
| Patients with planned assessment of collagen-induced platelet aggregation, No. <sup>a</sup> | 60                  | 61                   | 47                   |         |
| Collagen 31 µg/ml, median (IQR), AU x min <sup>b</sup>                                      | 11.5 (0.0, 35.2)    | 25.0 (0.0, 55.0)     | 17.5 (7.2, 52.0)     | 0.13    |
| Collagen 93 µg/ml, median (IQR), AU x min <sup>c</sup>                                      | 17.0 (0.0, 40.0)    | 31.0 (6.8, 65.0)     | 30.5 (13.2, 76.0)    | 0.03    |
| Collagen 253 µg/ml, median (IQR), AU x min <sup>d</sup>                                     | 26.5 (10.5, 62.2)   | 43.5 (22.8, 99.5)    | 41.0 (31.2, 101.0)   | 0.02    |
| Patients with planned assessment of ADP-induced platelet aggregation, No. <sup>e</sup>      | 73                  | 75                   | 57                   |         |
| ADP, median (IQR), AU x min <sup>f</sup>                                                    | 136.0 (99.0, 177.0) | 167.0 (109.5, 204.5) | 143.0 (108.2, 209.2) | 0.11    |

ADP, Adenosine Diphosphate; AU, Aggregation Unit.

<sup>a</sup> Assessment of collagen-induced platelet aggregation was planned to be done in one participating center.

<sup>b</sup> Not available in 2 patients (1 in the Revacept 80 mg group and 1 in the Placebo group).

<sup>c</sup> Not available in 2 patients (1 in the Revacept 80 mg group and 1 in the Placebo group).

<sup>d</sup> Not available in 4 patients (2 in the Revacept 160 mg group, 1 in the Revacept 80 mg group and 1 in the Placebo group).

<sup>e</sup> Assessment of ADP-induced platelet aggregation was planned to be done in 2 participating centers.

<sup>f</sup> ADP-induced platelet aggregation not available in 1 patient in the Placebo group.

**eFigure 1.** Kaplan–Meier Survival Curves of Major Adverse Cardiovascular Events (Left Panel) and BARC Type 2 to 5 Bleeding (Right Panel) at 30 Days.

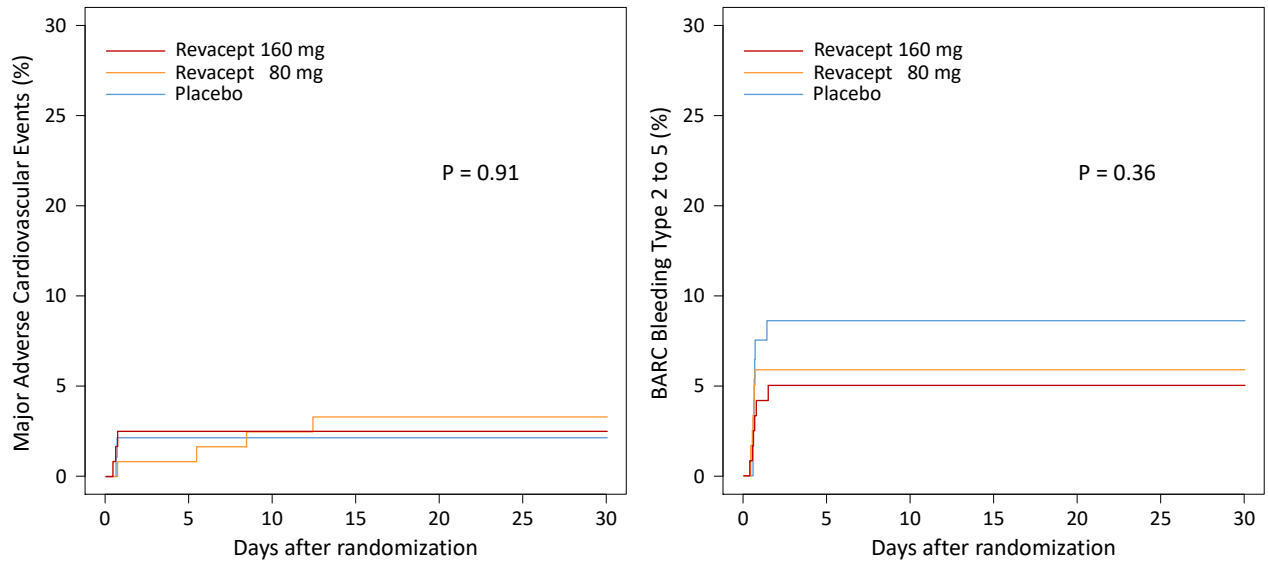

BARC, Bleeding Academic Research Consortium. Major adverse cardiovascular events was the composite of death, myocardial infarction, stroke or urgent coronary revascularisation.

## 5. eMethods

### Inclusion and Exclusion Criteria

#### Inclusion criteria:

- Signed written informed consent
- Men and women >18 years of age
- Diagnosis: Clinically stable coronary artery disease\*
- Angiographic evidence of coronary artery disease
- Indication for PCI

#### Exclusion criteria:

- WOCBP who are unwilling or unable to use an acceptable method to avoid pregnancy for up to 4 weeks after receiving investigational product.
- Women who are pregnant or breastfeeding or are planning pregnancy during course of trial
- Women with a positive pregnancy test on enrolment or prior to investigational product administration.
- Patients with elevated high sensitivity cardiac troponin T levels at screening
- Patients receiving antithrombotic therapy with Prasugrel or Ticagrelor within 7 days prior to randomisation<sup>1</sup>
- History of hypersensitivity, contraindication or serious adverse reaction to any component of the study drug (GPVI-Fc, sucrose, mannitol), acetylsalicylic acid or clopidogrel
- History of bleeding diathesis or active bleeding within the last 30 days
- Recent intracerebral hemorrhage or trauma within the last 3 months
- Thrombocytopenia (platelet count <30000/mm<sup>3</sup>) at screening
- Sustained hypertension (systolic BP >179mmHg or diastolic BP >109mmHg) at

- screening
- Renal failure (estimated glomerular filtration rate < 30ml/min and/or dialysis)
- Severe systemic disease, such as known malignancies or other comorbid conditions
- with life expectancy less than one year that may result in protocol non-compliance
- Unable to provide informed consent (e.g. severe dementia, or psychosis)
- Current severe liver dysfunction (transaminase level >5-fold the upper normal range limit)
- Patients with an indication for anticoagulant therapy
- Participation in any other clinical interventional trial (drug/device) within less than 30 days prior to screening
- Any other contraindication to perform PCI
- Any planned additional PCI or surgery within 30 days after randomisation
- Suspected poor capability to follow instructions and cooperate
- Prisoners or subjects who are involuntarily incarcerated
- Subjects who are compulsorily detained for treatment of either a psychiatric or physical illness (e.g. infectious disease)

\*The diagnosis of stable coronary artery disease implies the exclusion of acute coronary syndromes as defined in current guidelines of the European Society of Cardiology (Eur Heart J 2016;37(3):267-315).

## **Measurement of High Sensitivity Troponin T**

Blood samples were collected at baseline before randomization and at least once at  $48 \pm 12$  h after randomization in tubes containing a lithium-heparin anticoagulant. Troponin T was measured by a high-sensitivity assay in a cobas e 411 immunoanalyzer using electrochemiluminescence technology (Roche Diagnostics, Risch-Rotkreuz, Switzerland). The limit of blank for this assay (the concentration below which analyte-free samples are found with 95% probability) is  $\leq 0.003$  mg/l. The functional sensitivity (the lowest analyte concentration that can be reproducibly measured with a coefficient of variation  $\leq 10\%$ ) is  $\leq 0.013$  mg/l. The 99th percentile of healthy persons URL is 0.014 mg/l.
